# Supplementary material for: LRRK2 Inhibition Mitigates the Neuroinflammation Caused by TLR2-Specific α-Synuclein and Alleviates Neuroinflammation-Derived Dopaminergic Neuronal Loss
Source: MDPI journal article supplement (doi:10.3390/cells11050861), 2022-03-02
Supplement: s1 [file s1]

## Supplementary Figures

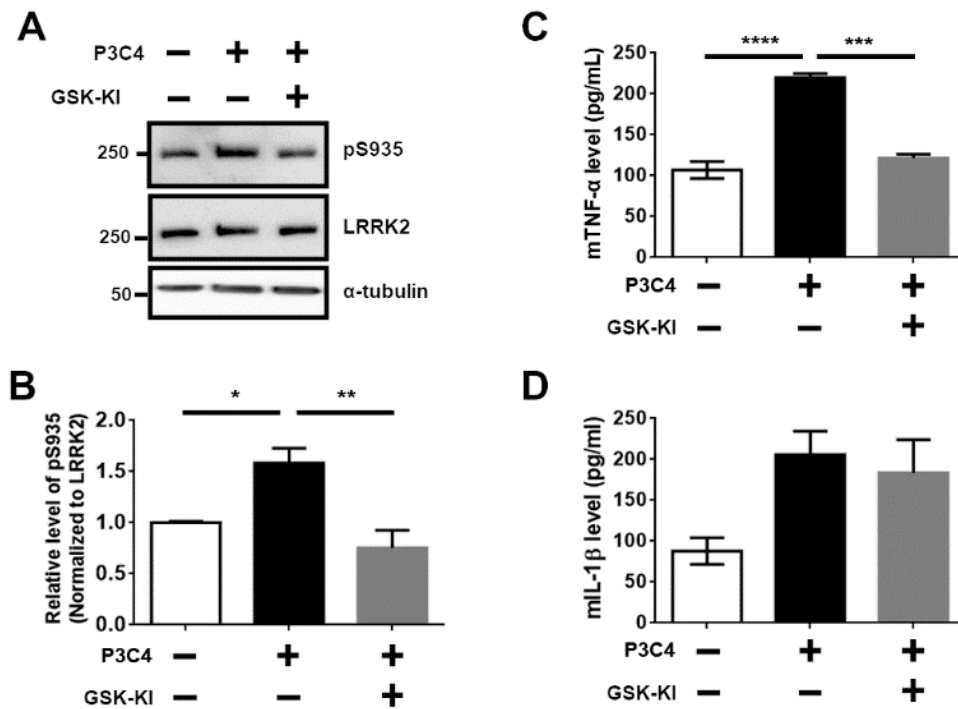

**Figure S1.** LRRK2 kinase inhibitor decreased TLR2-mediated upregulation of kinase activity and mTNF $\alpha$  level. **(A,B)** Pam3CSK4 (P3C4) treatment with or without GSK-KI (GSK2578215A) was subjected to western blot, and S935 phosphorylation levels of LRRK2 were analysed. We assessed the released levels of mTNF $\alpha$  **(C)** and mL-1 $\beta$  **(D)** in the media from **(A)**. One-way ANOVA with Bonferroni's post-hoc test, \*  $p < 0.05$ , \*\*  $p < 0.01$ , \*\*\*  $p < 0.001$ , \*\*\*\*  $p < 0.0001$ ;  $n = 4$ . Data are represented as mean  $\pm$  SEM.

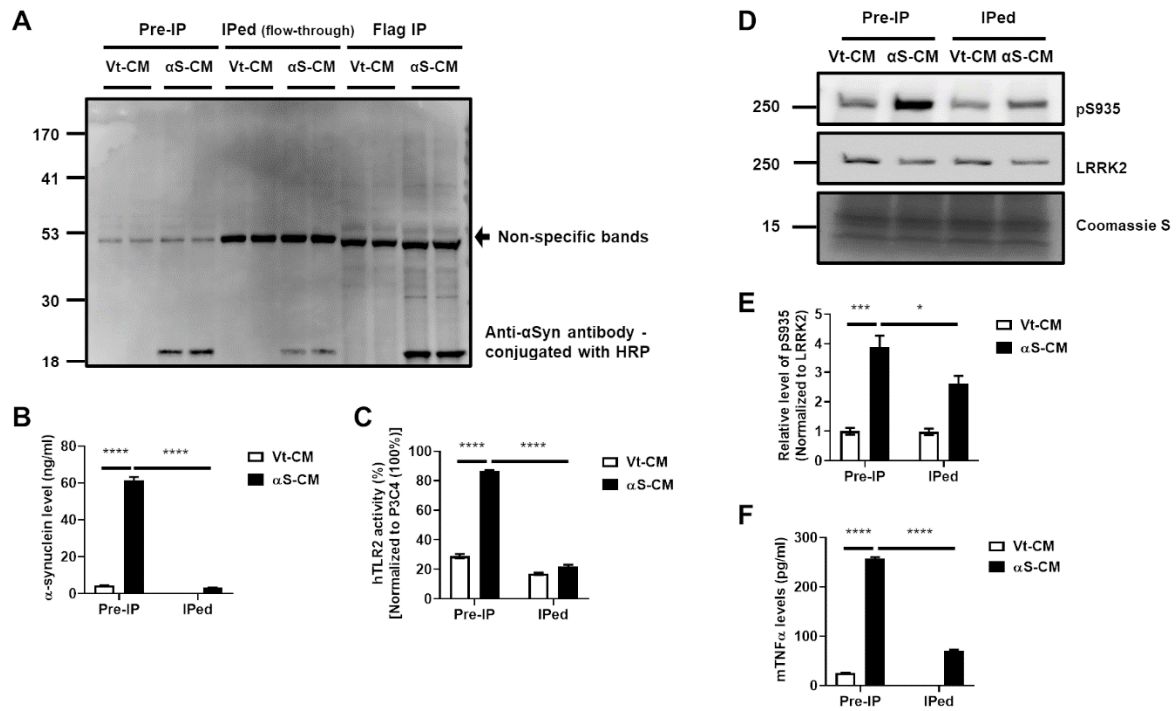

**Figure S2.** Removal of  $\alpha$ Syn in  $\alpha$ S-CM ameliorated LRRK2 kinase activation and pro-inflammatory cytokine releases in BV2 cells. The immunoprecipitation (IP) of original Vt- or  $\alpha$ S-CM (Pre-IP) with Flag antibody segregated Vt- or  $\alpha$ S-CM to Flag-IP fraction, the bead fraction, and IPed fraction, the supernatant of IP mixture. These fractions were analysed with western blot (A),  $\alpha$ Syn sandwich ELISA (B), hTLR2 activity (C). The Pre-IP or IPed fraction were treated to BV2 cells. LRRK2 kinase activation (D,E), the levels of mTNF $\alpha$  release (F) were analysed. Student's *t*-test, \*  $p < 0.05$ , \*\*\*  $p < 0.001$ , \*\*\*\*  $p < 0.0001$ ;  $n = 3$ . Data are represented as mean  $\pm$  SEM.

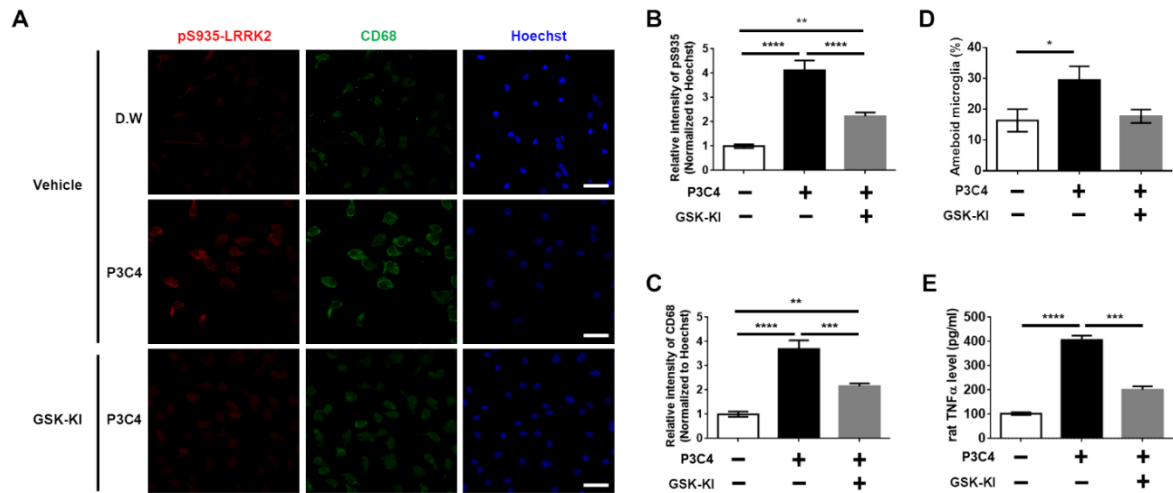

**Figure S3.** LRRK2 kinase inhibitor decreased TLR2-induced microglial activation in a rat primary microglia. The change of LRRK2 kinase activity by the treatment of P3C4 with or without GSK-KI was analysed with immunostaining of pS935 and CD68 (A–C), and the microglia with ameboid morphology were counted (D). Distilled water (D.W) was used for the solvent of P3C4. The released levels of rat TNF $\alpha$  from were measured by ELISA (E).  $n = 3$ , approximately 40-65 cells for IF. One-way ANOVA with Bonferroni's post-hoc test, \*  $p < 0.05$ , \*\*  $p < 0.01$ , \*\*\*  $p < 0.001$ , \*\*\*\*  $p < 0.0001$ ;  $n = 4$ . Data are represented as mean  $\pm$  SEM.

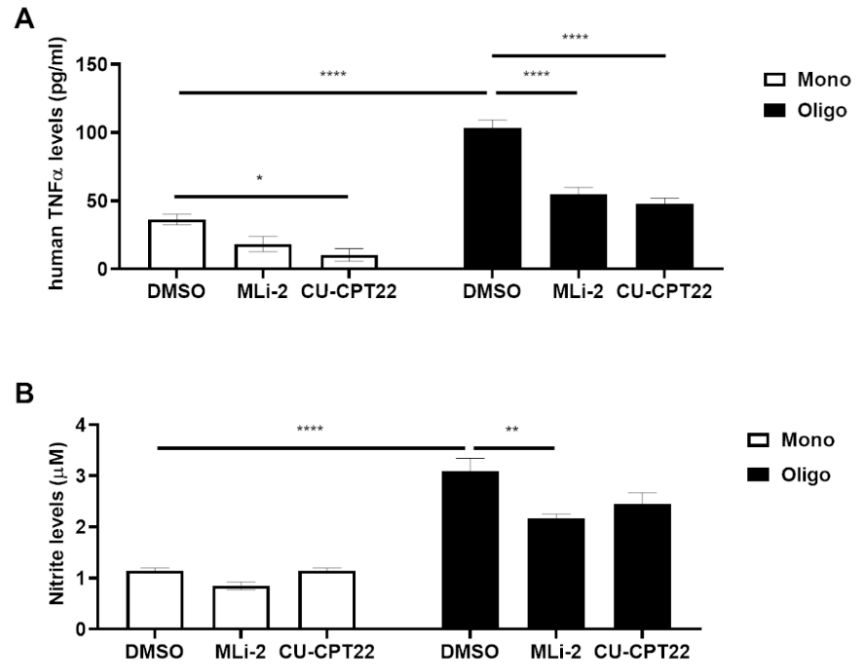

**Figure S4.** The increase of pro-inflammatory responses by oligomeric  $\alpha$ Syn stimulating TLR2 was mitigated by the LRRK2 kinase inhibition and TLR2 antagonizing. The co-treatments of 0.2  $\mu$ g/ml monomer  $\alpha$ Syn (Mono) and oligomer (Oligo) with DMSO, MLI-2 (0.5  $\mu$ M), or CU-CPT22 (0.5  $\mu$ M), a TLR2 antagonist, were incubated for 18h in C20. The culture media were analysed with human TNF $\alpha$  ELISA (**A**) and Greiss assay (**B**). One-way ANOVA with Tukey's post-hoc test, \*  $p < 0.05$ , \*\*  $p < 0.01$ , \*\*\*  $p < 0.0001$ ;  $n = 4$ . Data are represented as mean  $\pm$  SEM.

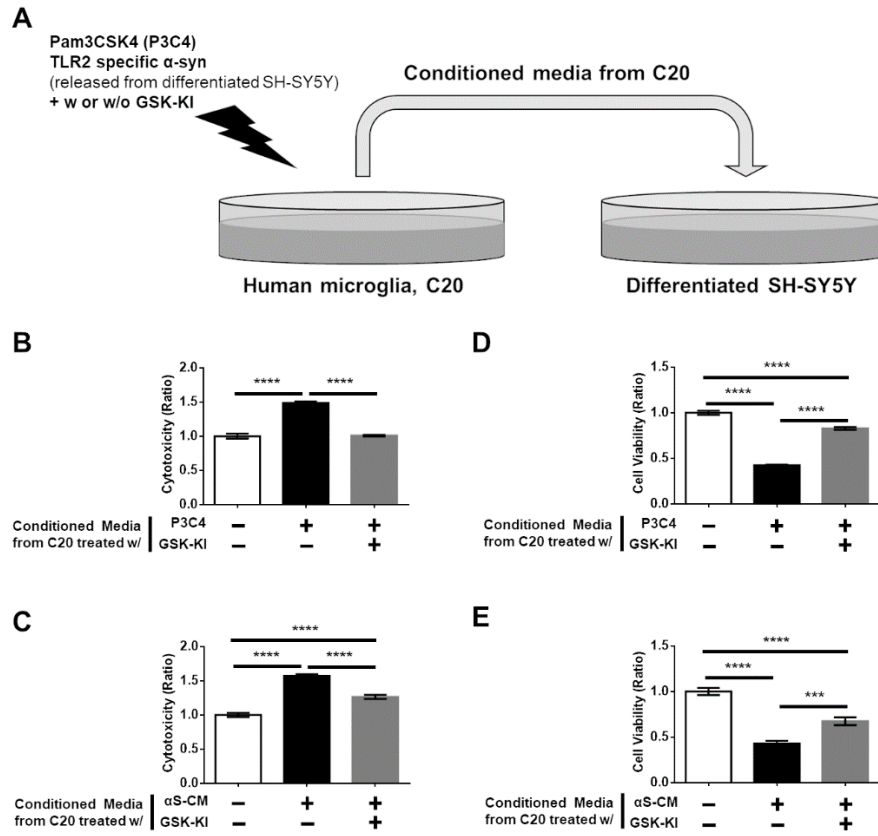

**Figure S5.** LRRK2 kinase inhibitor reduced the neuronal toxicity provoked by conditioned media of C20 via the TLR2 stimulation. The schematic description of the experiment was shown in (A). We measured the released LDH activity, as cytotoxicity (B), and cell viability using CCK-8 (C) in dSH cultured with the conditioned media from P3C4-treated C20. dSH cultured with the conditioned media from  $\alpha$ S-CM-treated C20 was also analysed with cytotoxicity (D) and cell viability (E). One-way ANOVA with Tukey's post-hoc test, \*\*\*  $p < 0.001$ , \*\*\*\*  $p < 0.0001$ ;  $n = 5$ . Data are represented as mean  $\pm$  SEM.
